# Supplementary material for: Histone Acetylation Regulator Gcn5 Mediates Drug Resistance and Virulence of Candida glabrata
Source: PubMed Central journal article supplement (PMC9241792; doi:10.1128/spectrum.00963-22), 2022-06-06
Supplement: spectrum.00963-22-s0001.pdf [file spectrum.00963-22-s0001.pdf]

1 **Histone Acetylation Regulator Gcn5 Mediates Drug Resistance and Virulence of *Candida glabrata***

2 Shuying Yu<sup>1,2,3</sup>, Padmaja Paderu<sup>1</sup>, Annie Lee<sup>1</sup>, Sami Eirekat<sup>4</sup>, Kelley Healey<sup>4</sup>, Liang Chen<sup>1,5</sup>, David S. Perlin<sup>1,5</sup>,  
3 Yanan Zhao<sup>1,5\*</sup>

4  
5 <sup>1</sup>Center for Discovery and Innovation, Hackensack Meridian Health, Nutley, New Jersey, USA.

6 <sup>2</sup>Department of Clinical Laboratory, Peking Union Medical College Hospital, Chinese Academy of Medical  
7 Sciences, Beijing, P. R. China.

8 <sup>3</sup>Beijing Key Laboratory for Mechanisms Research and Precision Diagnosis of Invasive Fungal Diseases  
9 (BZ0447), Beijing, China.

10 <sup>4</sup>Department of Biology, William Paterson University, Wayne, New Jersey, USA.

11 <sup>5</sup>Department of Medical Sciences, Hackensack Meridian School of Medicine, Nutley, New Jersey, USA.

12 <sup>6</sup>Department of Microbiology and Immunology, Georgetown University School of Medicine, Washington, DC  
13 20057

14  
15  
16 \* Address correspondence to Yanan Zhao, Ph.D. [yanan.zhao@hmh-cdi.org](mailto:yanan.zhao@hmh-cdi.org), phone: 201-880-3503

17 **SUPPLEMENTARY MATERIALS**

18

19 ***FKS* mutant construction methods**

20 *FKS* mutant strains were constructed as described in Healey et al., 2020 (1). Briefly, Fks1-625delF, Fks1-S629P,  
 21 Fks2-659delF, and Fks2-S663P were generated in strain ATCC 2001 through transformation of a purified PCR  
 22 product. Desired mutations were PCR-amplified along with regions flanking the *FKS1* or *FKS2* hotspot 1 region  
 23 (approximately 400 bp) from mutant isolates (see **Table S1** for primers). Transformants were selected on low  
 24 levels of caspofungin- (0.3 µg/mL) or micafungin- (0.03 µg/mL) containing YPD agar medium. All *FKS1* and  
 25 *FKS2* hotspots were sequenced in each transformant to confirm the expected mutation was present and all other  
 26 amino acids remained unaltered.

27

28 **Figure S1.** Growth curves of *Candida glabrata* wild type (WT), *gcn5Δ* and *gcn5Δ::GCN5* strains in YPD media.

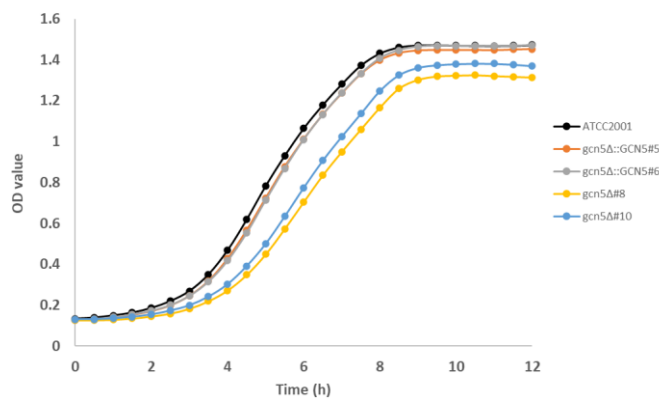

29

30

31 **Figure S2.** (A) Immunoblots showed visibly decreased abundance of both H3K9Ac and H3K14Ac in *gcn5Δ*,  
 32 compared to WT and complemented strains. (B) Acetylation level comparison in WT, *gcn5Δ*, and  
 33 *gcn5Δ::GCN5*. Signals of H3K9Ac and H3K14Ac were normalized to that of H3 in corresponding strain.  
 34 Acetylated H3K9 and H3K14 in *gcn5Δ* decreased to 60% and 46% of that in WT, respectively. Representative  
 35 blots from two independent experiments and mean ratios ± SD are shown.

(A)

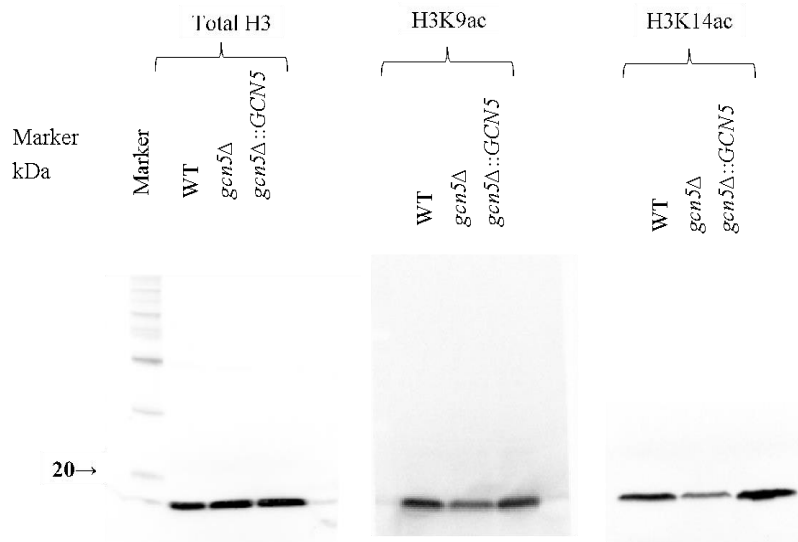

(B)

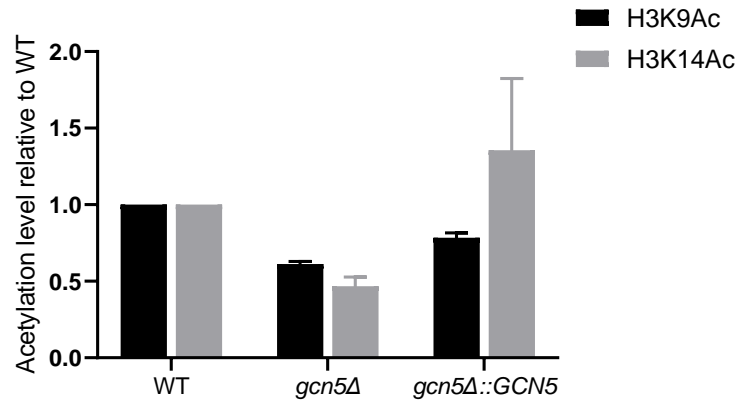

36

37 **Figure S3.** qRT-PCR verification of representative DEGs in *gcn5Δ* cells. Expression was normalized to  
 38 reference gene *PGK1* and shown as a fold change compared to WT. Plots represent the mean  $\pm$  SD from  $\geq 3$   
 39 independent experiments (\* $P < 0.05$ , \*\* $P < 0.01$ , \*\*\* $P < 0.001$ ).

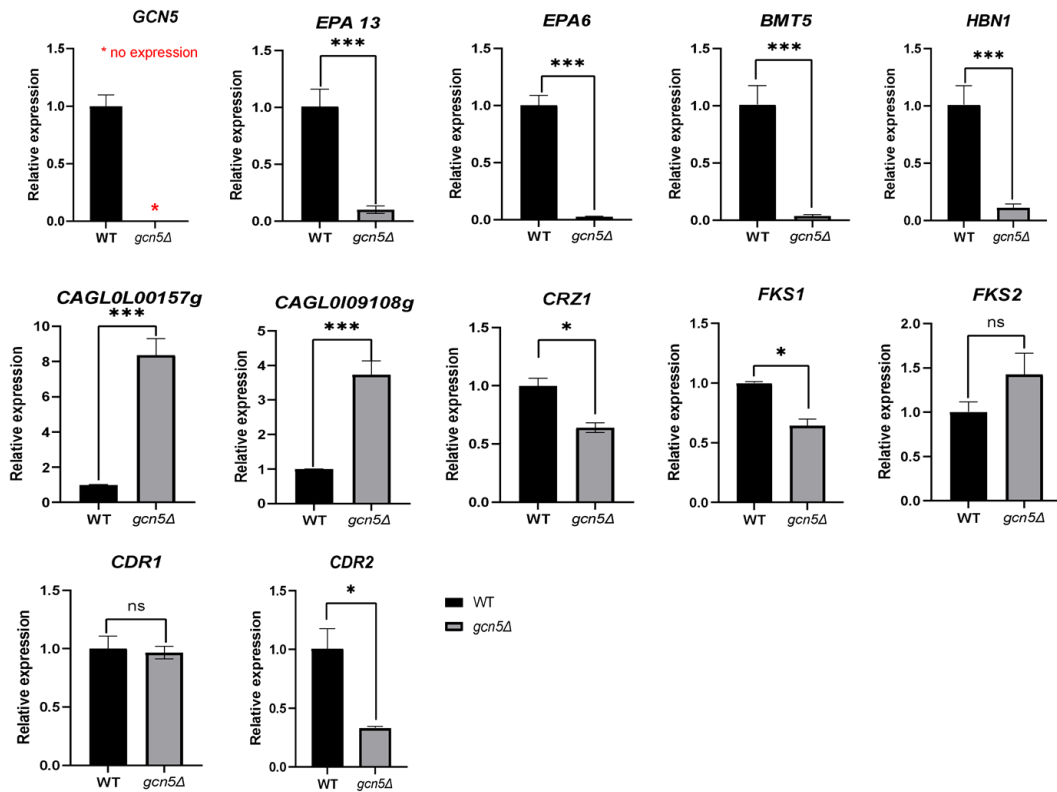

40

41

42 **Figure S4.** Venn diagram of upregulated gene sets in WT and *gcn5Δ* associated with fluconazole treatment.

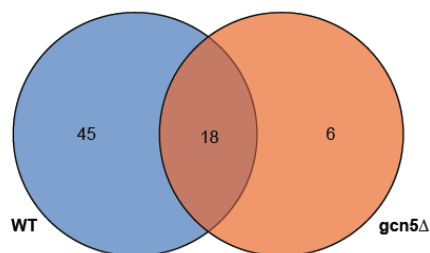

43

44

45 **Figure S5.** qRT-PCR verification of representative DEGs in WT and *gcn5* $\Delta$  cells in response to fluconazole  
46 (FLC) pressure. Expression was normalized to reference gene *PGK1* and shown as a fold change compared to  
47 WT no drug control (NDC). Plots represent the mean  $\pm$  SD from  $\geq 3$  independent experiments ( $*P < 0.05$ ,  
48  $**P < 0.01$ ,  $***P < 0.001$ ).

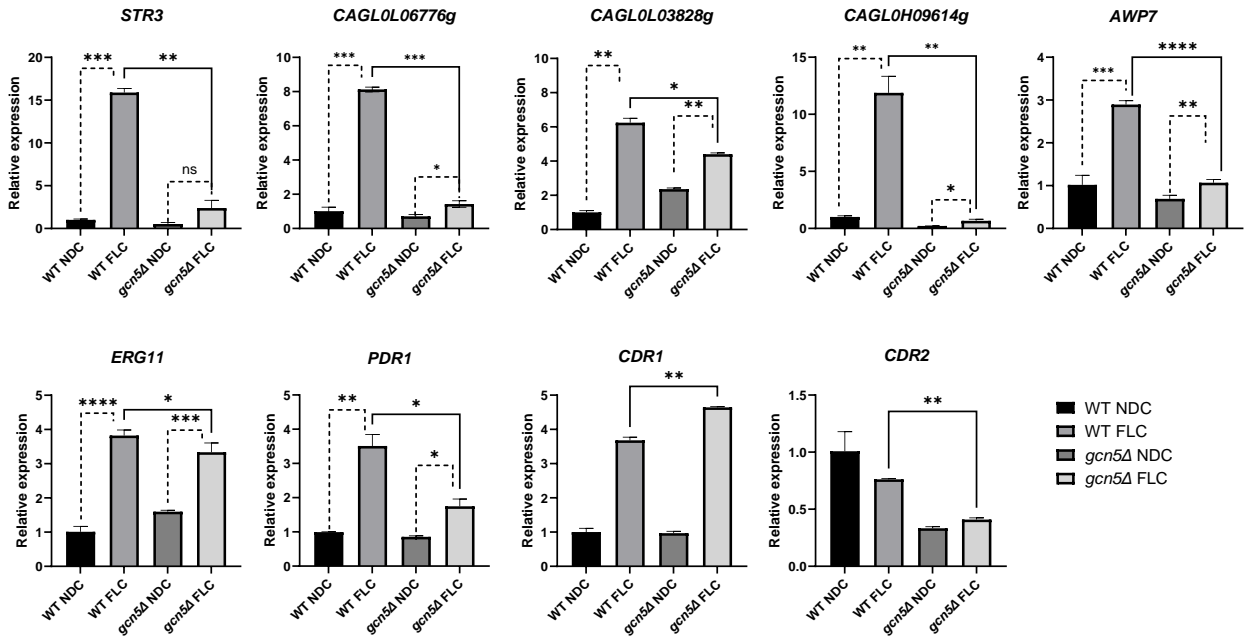

49

50

51 **Figure S6.** Venn diagram of micafungin triggered up- and down-regulated gene sets in WT and *gcn5* $\Delta$  cells.

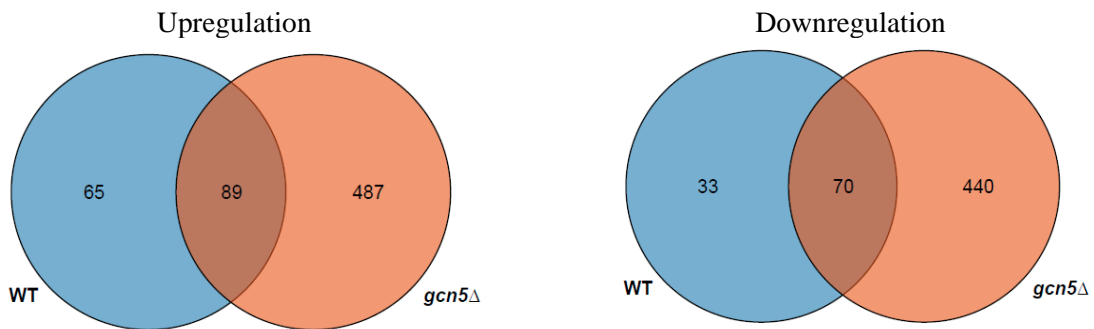

52

53

54

55

56 **Figure S7.** qRT-PCR verification of representative DEGs in WT and *gcn5Δ* cells triggered by micafungin  
 57 (MCF) treatment. Expression was normalized to reference gene *PGK1* and shown as a fold change compared  
 58 to WT no drug control (NDC). Plots represent the mean ± SD from ≥ 3 independent experiments (\**P* < 0.05,  
 59 \*\**P* < 0.01, \*\*\**P* < 0.001, ns denotes for no statistical significance).

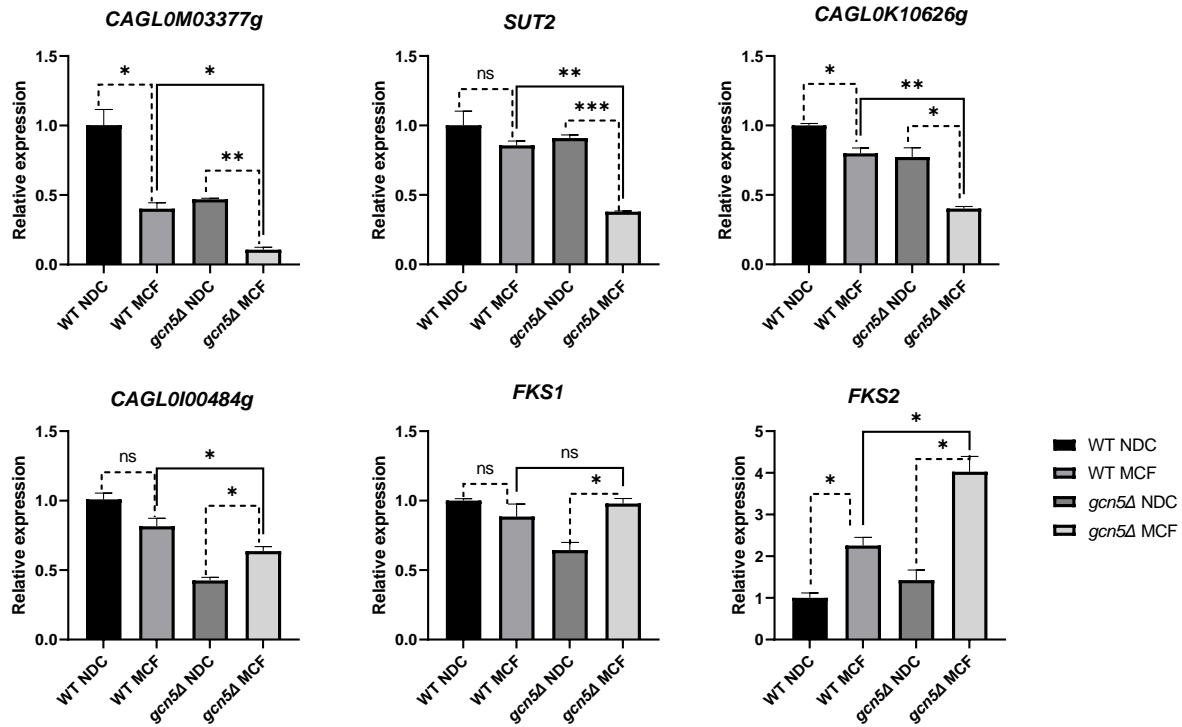

60  
 61  
 62

**Table S1. Sequences of primers and oligos used in this study**

| Oligo            | Sequence (5'-3')                                                        | Application                                                             |
|------------------|-------------------------------------------------------------------------|-------------------------------------------------------------------------|
| GCN5-F364        | CCATTACACAATGTTTTACCCG                                                  | <i>GCN5</i> upstream PCR                                                |
| pRS_GCIN5_R-67   | CTCAGTACAATCTGCTCTGATGCCGGCAA<br>CTCAAACCTGTTCCGCTCG                    | <i>GCN5</i> upstream PCR                                                |
| CYC1_GCIN5_F1757 | AGTTATGTCACGCTTACATTACGCAGTAT                                           | <i>GCN5</i> downstream PCR                                              |
| GCN5-R2071       | GTAGAAACACGGTAAATAGAC                                                   | <i>GCN5</i> downstream PCR                                              |
| pRS-F            | GGGTAAAACACGGCAACAAA                                                    | Amplification of <i>NAT</i> cassette from pCN-PDC1                      |
| CYC1-R           | CGGCATCAGAGCAGATTGTA                                                    | Amplification of <i>NAT</i> cassette from pCN-PDC1                      |
| TEFp263F         | CCGTGAATGTAAGCGTGAC                                                     | <i>GCN5</i> knockout validation sequencing                              |
| NAT297R          | TTCGATGACCTCCCATTTGAT                                                   | <i>GCN5</i> knockout validation sequencing                              |
| Gcn5-crRNA       | GTACGAGACGACCACGAAGC<br><u>GAGAGGUGAACAAUCCACCGGUUUUAGA</u><br>GCUAUGCU | CRISPR crRNA, N20 sequence underlined                                   |
| NAT-crRNA        | <u>CUGGACACCGCCUGUACGAGUUUUAGA</u><br>GCUAUGCU                          | CRISPR crRNA, N20 sequence underlined                                   |
| CgFKS1c1757F     | ACGTCGCTTCTCAAACCTTC                                                    | <i>FKS1</i> mutant construction, hotspot 1 PCR                          |
| CgFKS1c2225R     | GCGTTCAGACTTGGGAAAT                                                     | <i>FKS1</i> mutant construction, hotspot 1 PCR/sequence screen/sequence |
| CgFKS1c1674F     | GTTGCAGTCGCTACATTGCTA                                                   | <i>FKS1</i> mutant construction, hotspot 2 PCR                          |
| CgFKS1c3918F     | CGCTCTTGACACGAATCTA                                                     | <i>FKS1</i> mutant construction, hotspot 2 PCR/sequence                 |
| CgFKS1c4225R     | CACCACCAACAGTCAAATCG                                                    | <i>FKS1</i> mutant construction, hotspot 2 PCR/sequence                 |
| CgFKS2c1790F     | CGATTATGCCATTAGGTGGTC                                                   | <i>FKS2</i> mutant construction, hotspot 1 PCR                          |
| CgFKS2c2165R     | CCAACAGAGAAGCAGTGTGTA                                                   | <i>FKS2</i> mutant construction, hotspot 1 PCR/sequence screen/sequence |
| CgFKS2c1419F     | GGATTATGCACGTTTCCGTC                                                    | <i>FKS2</i> mutant construction, hotspot 2 PCR                          |
| CgFKS2c3930F     | GCATCCTGGTTTCCATTGTA                                                    | <i>FKS2</i> mutant construction, hotspot 2 PCR/sequence                 |
| CgFKS2c4312R     | GATTGGATCAGACGTTATACATTG                                                | <i>FKS2</i> mutant construction, hotspot 2 PCR/sequence                 |
| PDR1u175-F       | AACAAGCATAGAGGCGCTGT                                                    | <i>PDR1</i> amplification                                               |
| PDR1d110-R       | TGAGGTAGTCTAAGTCTCATG                                                   | <i>PDR1</i> amplification and sequencing                                |

|                |                          |                        |
|----------------|--------------------------|------------------------|
| PDR1-c828R     | AAGTGACTTAGTGGTGGCAC     | <i>PDR1</i> sequencing |
| PDR1-c1703R    | GCAACAGCTACATTCAAGACC    | <i>PDR1</i> sequencing |
| PDR1-c2600R    | CTGCATACTTTGGCACTCT      | <i>PDR1</i> sequencing |
| PGK1-F         | CAAACGGTGAAAGAAACGAGAA   |                        |
| PGK1-R         | CCGACACAGTCGTTCAAGAAAG   |                        |
| GCN5-F         | GGTGTCTAAACGGCAGAAAG     |                        |
| GCN5-R         | CTCTTCGTCTTCGTCTCTATTG   |                        |
| EPA13-F        | CAACTTTCCTTTGGCTTTC      |                        |
| EPA13-R        | CTTTCGTTCGTCGTGACTA      |                        |
| EPA6-F         | GATGGACGGACCCTACTGAA     |                        |
| EPA6-R         | GCCTGTTTCGAGGATAATTTCG   |                        |
| BMT5-F         | TCCATTGACGATACGTTGGA     |                        |
| BMT5-R         | TCTTTGTCAAACGCTTGTGC     |                        |
| BMT2-F         | ACCGCACAGGAAAATCAATC     |                        |
| BMT2-R         | AAGATGCACCTTCCGTCATC     |                        |
| HBN1-F         | TGATGACAAGACCACCGAAA     |                        |
| HBN1-R         | AAGAGGCTGGGATCTTGGAT     |                        |
| CAGL0I09108g-F | ACTGGGAACCTGGTCTTGGTG    |                        |
| CAGL0I09108g-R | TTCTTAGGCACACGCTCCTT     |                        |
| CAGL0L00157g-F | ACTGATGAGCACGGTCACAC     |                        |
| CAGL0L00157g-R | AGCTTGTGTTGGCTTTTCGT     |                        |
| FKS1-F         | CCTCACTATGCTGAAAGAATT    |                        |
| FKS1-R         | AGGATCTTGATCATCCATACC    |                        |
| FKS2-F         | ATATGTCTGGTTCGTCAACTCC   |                        |
| FKS2-R         | AACGGGACTTTGTGGATCAG     |                        |
| CDR1-F         | TAGCACATCAACTACACGAACGT  |                        |
| CDR1-R         | AGAGTGAACATTAAGGATGCCATG |                        |
| CDR2-F         | GTGCTTTATGAAGGCTACCAGATT |                        |
| CDR2-R         | TCTTAGGACAGAAGTAACCCATCT | qRT-PCR verification   |
| CRZ1-F         | TTTTGGCGGAGATAATCAGG     |                        |
| CRZ1-R         | AGGCTGCATAAAGGGGCTAT     |                        |
| STR3-F         | GTCACTGGTTGGAGGAAGGA     |                        |
| STR3-R         | TCTTTGATATTGGTATGGAGCC   |                        |
| CAGL0L06776g-F | CTGCTGATGCAAAAATCCAA     |                        |
| CAGL0L06776g-R | GCCATAGGGTCCTCTTCTCC     |                        |
| CAGL0L03828g-F | CGGTGACTTCGTTGACATTG     |                        |
| CAGL0L03828g-R | CCAACTTACCACCACCTTCG     |                        |
| CAGL0H09614g-F | CCATCTTCTTCCAAGGCTTC     |                        |
| CAGL0H09614g-R | TCACCGATTTGAGAGATAGC     |                        |
| AWP7-F         | TGCTCAGAAACCGACAATCA     |                        |
| AWP7-R         | CTGTGATGGCCTCACTAGCA     |                        |
| ERG11-Fn       | ACGGTACCAAGCCATACGAG     |                        |
| ERG11-Rn       | GAACACTGGGGTGGTCAAGT     |                        |
| PDR1-F         | AAAGGGAGTGACAGCGAGAA     |                        |
| PDR1-R         | ATGGCGTCAATGGATGATTT     |                        |
| CAGL0M03377g-F | TGGGATTCCTGTTTATTCAA     |                        |
| CAGL0M03377g-R | CGTTGTAGTCACCGCTGAAA     |                        |
| CAGL0K10626g-F | CAACAAGGTCGGTGGTATTTAC   |                        |
| CAGL0K10626g-R | ACAGGTTGAAGCTCCTCTGAG    |                        |
| CAGL0I00484g-F | CTGTAAGTGCCTTGGCTAAG     |                        |
| CAGL0I00484g-R | CCTCGAATAGAGATGGAGTGA    |                        |
| SUT2-F         | CTAACATCGGTGCCACATTG     |                        |
| SUT2-R         | GCAGACACAAAAGGGGAAGA     |                        |

63

64

65

## Reference

66

1. Healey KR, Paderu P, Hou X, Jimenez Ortigosa C, Bagley N, Patel B, Zhao Y, Perlin DS. 2020. Differential Regulation of Echinocandin Targets Fks1 and Fks2 in *Candida glabrata* by the Post-Transcriptional Regulator Ssd1. *J Fungi (Basel)* 6.

67

68
